# Supplementary material for: Transparent conductive oxide type materials as the anode of solid oxide fuel cells at a reduced temperature
Source: Royal Society of Chemistry journal article supplement (doi:10.1039/d2ta06915f), 2022-01-01
Supplement: d2ta06915f1.pdf [file d2ta06915f1.pdf]

## Supplementary information

# Transparent Conductive Oxide Type Material for the Anode of Solid Oxide Fuel Cells at a Reduced Temperature

Xuelin Zhang <sup>a</sup>, Yuan Zhang <sup>a</sup>, Jiupai Ni <sup>a, b</sup>, John T.S. Irvine <sup>a, c</sup>, Chengsheng Ni <sup>a, b</sup> \*

*a* College of Resource and Environment, Southwest University, Beibei, Chongqing, China, 400715

*b* National Base of International S&T Collaboration on Water Environmental Monitoring and Simulation in Three Gorges Reservoir Region, Chongqing 400716, China

*c* School of Chemistry, University of St Andrews, North Haugh, KY16 9ST, Scotland, UK

Email: nichengsheg@swu.edu.cn

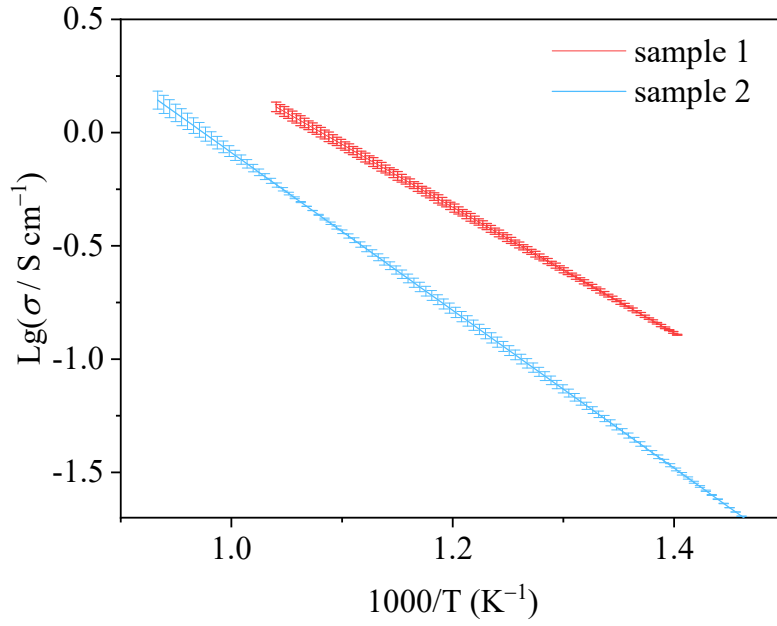

Figure S1. The fitting curves with error bars in Arrhenius plots of  $\sigma$  of ZGO for sample 1 (reduced at 700 °C) and sample 2 (reduced at 800 °C). The error bars were obtained by plotting the residuals obtained by linear regression fitting of  $\sigma$ .

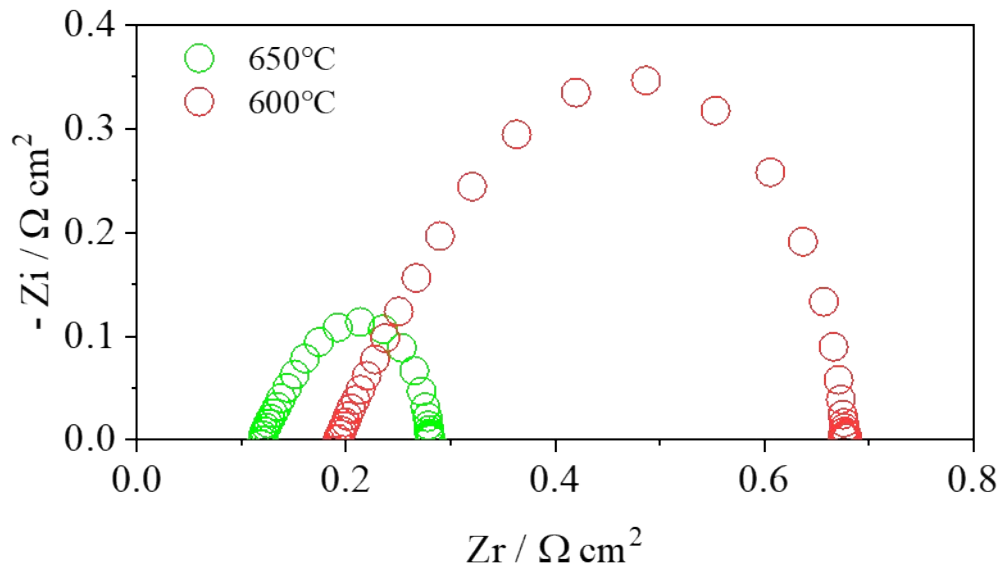

Figure S2. EIS spectra of the GDC-LSFC half-cell on a SSZ electrolyte in air at 600 °C and 650 °C.

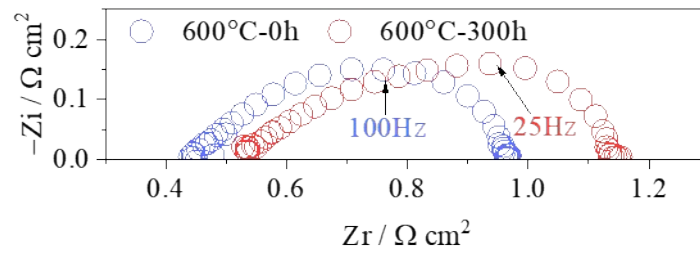

Figure S3. EIS of ZGO/GDC-1%Ni cell under H<sub>2</sub> after the durability under bias for 0 h and 300 h, respectively. The testing temperature was 600 °C and the voltage was at OCV.

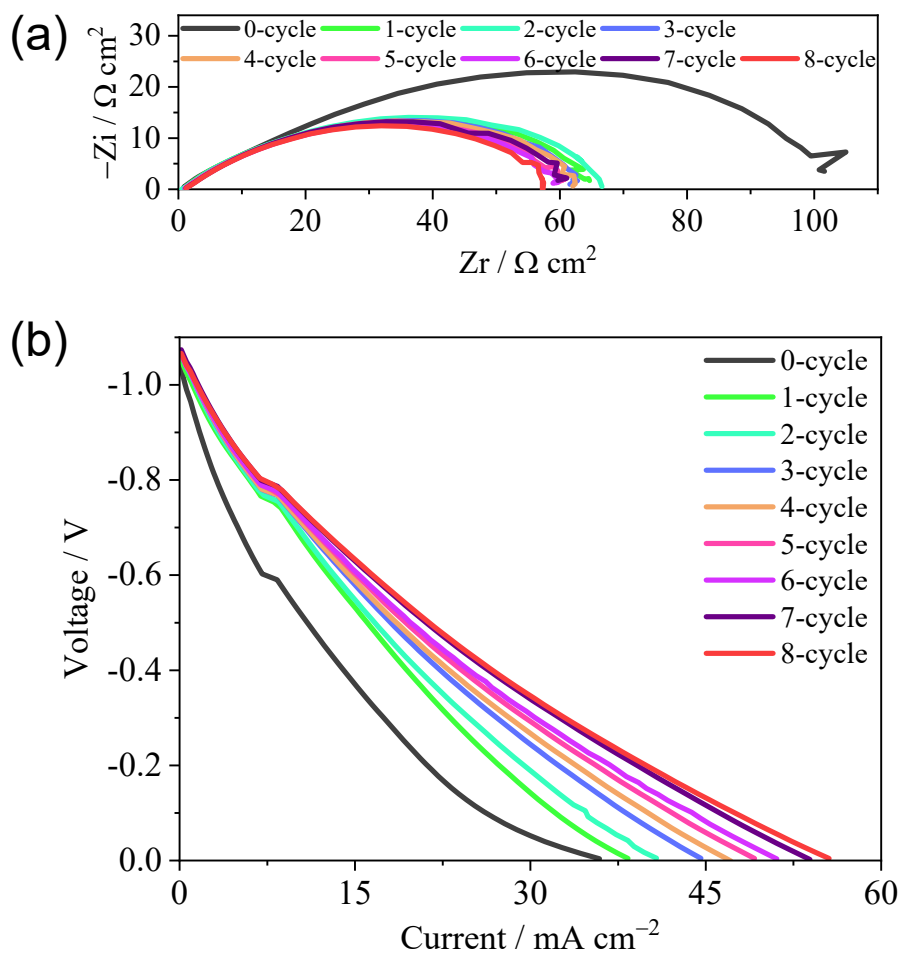

Figure S4. (a) EIS and (b) I-V curves of ZGO-1% Ni cell under H<sub>2</sub> fuel during the redox cycles at 600 °C.

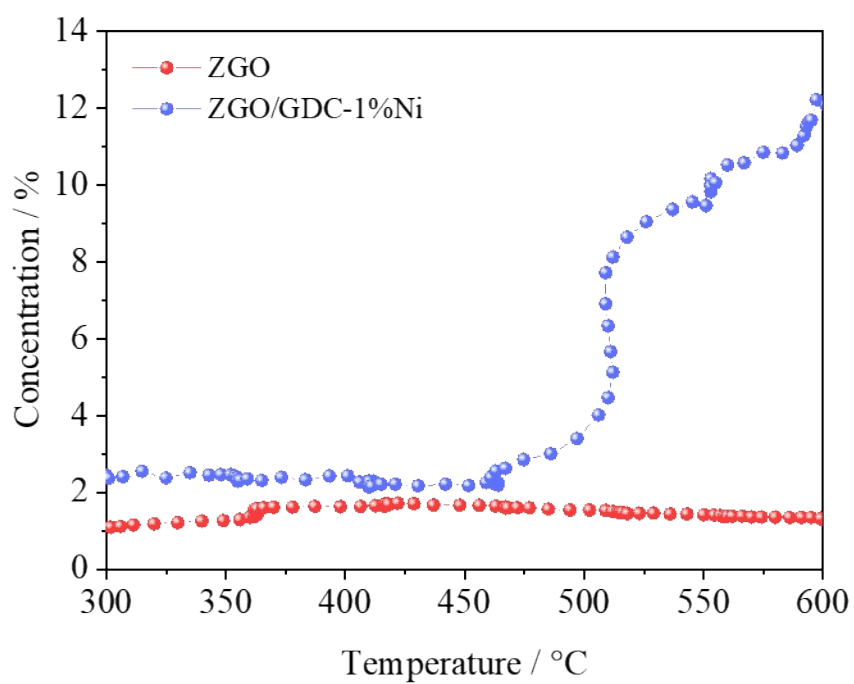

Figure S5. H<sub>2</sub> evolution from ethanol over ZGO and ZGO/GDC-1% Ni from 300 °C to 600 °C.

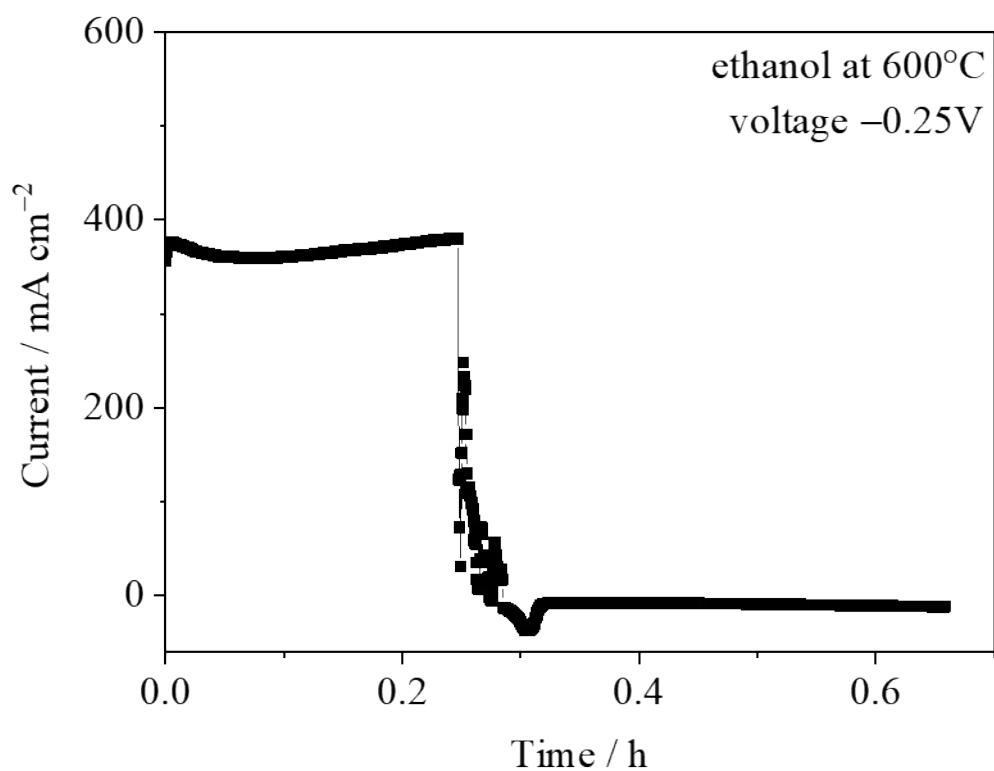

Figure S6. Chronoamperometry of the ZGO/GDC-1% Ni cell under ethanol fuel at  $-0.25\text{V}$  at  $600\text{ }^{\circ}\text{C}$ . The quick death of the cell could be linked to the deprotonation under bias.
